# Supplementary material
Source: ML conference proceedings conference paper supplement (https://proceedings.mlr.press/v108/kim20b.html)
Supplement: Supplementary file 1 [file kim20b-supp.pdf]

# Supplementary material for “On casting importance weighted autoencoder to an EM algorithm to learn deep generative models”

## 1 Proof of Proposition 1.

We can easily check that

$$\begin{aligned}
 \nabla_{\theta} \widehat{L}^{\text{IWAE}}(\theta, \phi; \mathbf{x}) &= \nabla_{\theta} \log \left( \frac{1}{K} \sum_{k=1}^K \frac{p(\mathbf{z}, \mathbf{x}_k; \theta)}{q(\mathbf{z}_k | \mathbf{x}; \phi)} \right) \\
 &= \sum_{k=1}^K \frac{w_k}{\sum_{k'} w_{k'}} \cdot \frac{\nabla_{\theta} w_k}{w_k} \\
 &= \sum_{k=1}^K \frac{w_k}{\sum_{k'} w_{k'}} \cdot \nabla_{\theta} \log w_k \\
 &= \sum_{k=1}^K \frac{w_k}{\sum_{k'} w_{k'}} \cdot \nabla_{\theta} \log p(\mathbf{x}, \mathbf{z}; \theta),
 \end{aligned}$$

where  $w_k$  is the weight defined in (2) of the paper, and thus the proof is done.  $\square$

## 2 Proof of Proposition 2.

Note that the Chi-squared distance is defined as

$$\chi^2(p||q) = \mathbb{E}_{\mathbf{z} \sim p} \left( \frac{p(\mathbf{z})}{q(\mathbf{z})} \right) - 1$$

for given two density functions  $p$  and  $q$ . We remind the dominated convergence theorem (DCT) in the sense of the convergence in probability which is summarized in the following lemma.

**Lemma 1.** *Suppose  $X_n \rightarrow X$  in probability and there is a continuous function  $g$  with  $g(x) > 0$  for large  $x$  with  $|x|/g(x) \rightarrow 0$  as  $|x| \rightarrow \infty$  so that  $\mathbb{E}g(X_n) \leq C < \infty$  for all  $n$ . Then  $\mathbb{E}X_n \rightarrow \mathbb{E}X$  as  $n \rightarrow \infty$ .*

Now we are ready to prove Proposition 2. Let  $\mathbf{z}_1, \dots, \mathbf{z}_K$  be random vectors whose density is  $q(\mathbf{z})$ . Using

$$\mathbb{E}_q \left( \frac{p(\mathbf{z})}{q(\mathbf{z})} \right) = 1,$$

we have

$$\chi^2(p||q) = \mathbb{E}_q \left( \frac{p(\mathbf{z})}{q(\mathbf{z})} \right)^2 - 1 = \text{Var}_q \left( \frac{p(\mathbf{z})}{q(\mathbf{z})} \right)$$

In turn, the central limit theorem implies

$$\sqrt{K} \left( \frac{1}{K} \sum_{k=1}^K \frac{p(\mathbf{z}_k)}{q(\mathbf{z}_k)} - 1 \right) \rightarrow N(0, \chi^2(p||q))$$

and thus

$$\frac{1}{K} \sum_{k=1}^K \frac{p(\mathbf{z}_k)}{q(\mathbf{z}_k)} - 1 = O_p(K^{-1/2}).$$

The rest of proof consists of two steps.

**[Step 1.]** Let  $Y_K := \frac{1}{K} \sum_{k=1}^K \left( \frac{p(\mathbf{z}_k)}{q(\mathbf{z}_k)} - 1 \right)$ . We are going to show that  $\mathbb{E}(KY_K^3) \rightarrow 0$  as  $K \rightarrow \infty$ . First, note that  $KY_K^3$  converges to 0 in probability since  $Y_K = O_p(K^{-1/2})$ . Let  $g(x) := |x|^{4/3}$ , then

$$\begin{aligned} \mathbb{E}(g(KY_K)) &= \frac{1}{K^{8/3}} \mathbb{E} \left[ \sum_{k=1}^K \left( \frac{p(\mathbf{z}_k)}{q(\mathbf{z}_k)} - 1 \right)^4 \right] \\ &= \frac{1}{K^{8/3}} \left[ \sum_{k=1}^K \mathbb{E} \left[ \left( \frac{p(\mathbf{z}_k)}{q(\mathbf{z}_k)} - 1 \right)^4 \right] + \sum_{k \neq k'} \mathbb{E} \left[ \left( \frac{p(\mathbf{z}_k)}{q(\mathbf{z}_k)} - 1 \right)^2 \right] \mathbb{E} \left[ \left( \frac{p(\mathbf{z}_{k'})}{q(\mathbf{z}_{k'})} - 1 \right)^2 \right] \right] \\ &= O(K^{-2/3}) < \infty. \end{aligned}$$

Thus we conclude that  $\mathbb{E}(KY_K^3) \rightarrow 0$  by Lemma 1.

**[Step 2.]** By Taylor's theorem, there exists  $\xi_K$  between 0 and  $Y_K$  such that

$$-\log \left( \frac{1}{K} \sum_{k=1}^K \frac{p(\mathbf{z}_k)}{q(\mathbf{z}_k)} \right) = -\log(1 + Y_K) = -Y_K + \frac{1}{2}Y_K^2 - \frac{(1 + \xi_K)^{-3}}{3}Y_K^3.$$

Since  $\xi_K$  is bounded, there exists a positive constant  $C > 0$  such that

$$-Y_K + \frac{1}{2}Y_K^2 - CY_K^3 \leq -\log(1 + Y_K) \leq -Y_K + \frac{1}{2}Y_K^2 + CY_K^3.$$

By taking expectation and multiplying  $2K$  and using the result of Step 1, we have

$$2K \cdot D^{IW}(q||p) = \chi^2(p||q) + o(1),$$

thus the proof is done.  $\square$

### 3 Image generation of IWEM

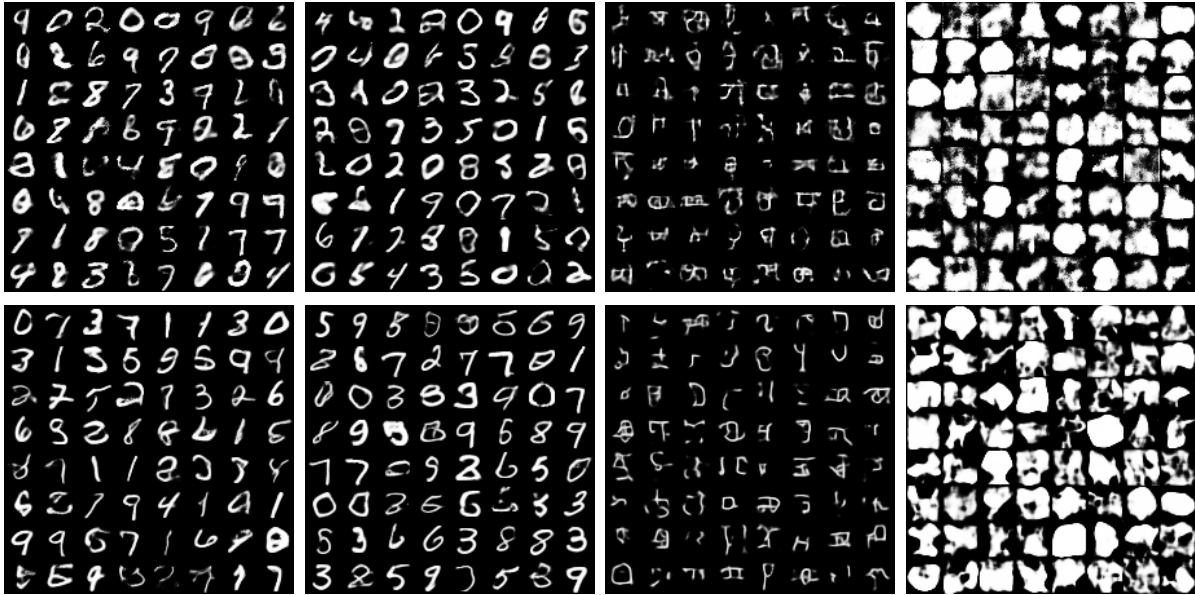

Figure 1: Randomly generated images of IWEM with (**Upper**) MLP and (**Lower**) CNN architectures over 4 datasets.
